# Supplementary material for: Luminescence properties of a Zn(ii) supramolecular framework: easily tunable optical properties by variation of the alkyl substitution of (E)-N-(pyridine-2-ylethylidyne)arylamine ligands
Source: Royal Society of Chemistry journal article supplement (doi:10.1039/c6ra20377a), 2016-01-01
Supplement: c6ra20377a1.pdf [file c6ra20377a1.pdf]

## Supporting Information

### Luminescent Properties of Zn(II) Supramolecular Framework: Easily Tunable Optical Properties by Variation of the Alkyl Substitution of (*E*)-*N*-(Pyridine-2-ylethylidene)arylamine Ligands

Yu-Wei Dong, Rui-Qing Fan,\* Wei Chen, Hui-Jie Zhang, Yang Song, Xi Du, Ping Wang, Li-Guo Wei, and Yu-Lin Yang,\*

MIT Key Laboratory of Critical Materials Technology for New Energy Conversion and Storage, School of Chemistry and Chemical Engineering, Harbin Institute of Technology, Harbin 150001 (P. R. China)

E-mail: fanruiqing@hit.edu.cn and ylyang@hit.edu.cn

#### Index

|            | Content                                                                                                                                                                                                                                                   | Page No. |
|------------|-----------------------------------------------------------------------------------------------------------------------------------------------------------------------------------------------------------------------------------------------------------|----------|
|            | <b>Experimental Section</b>                                                                                                                                                                                                                               | 1        |
| Figure S1  | IR spectra of ligands <b>L<sup>1</sup>–L<sup>5</sup></b> in KBr disks.                                                                                                                                                                                    | 4        |
| Figure S2  | IR spectra of complexes <b>Zn1–Zn5</b> in KBr disks.                                                                                                                                                                                                      | 5        |
| Figure S3  | <sup>1</sup> H NMR spectra of ligands <b>L<sup>1</sup>–L<sup>5</sup></b> in CDCl <sub>3</sub> .                                                                                                                                                           | 6        |
| Figure S4  | <sup>1</sup> H NMR spectra of complexes <b>Zn1–Zn5</b> in CDCl <sub>3</sub> .                                                                                                                                                                             | 7        |
| Figure S5  | Thermal gravimetric curves of complexes <b>Zn1–Zn5</b> .                                                                                                                                                                                                  | 8        |
| Figure S6  | Experimental (top) and simulated (bottom) PXRD patterns of complexes <b>Zn1–Zn5</b> .                                                                                                                                                                     | 9        |
| Figure S7  | Crystal structure of <b>Zn4</b> . Thermal ellipsoid is drawn at 50% probability. H atoms have been omitted for clarity.                                                                                                                                   | 10       |
| Figure S8  | UV–vis absorption spectra of <b>L<sup>1</sup>–L<sup>5</sup></b> in CH <sub>3</sub> CN at room temperature.                                                                                                                                                | 10       |
| Figure S9  | (a) Emission spectra of <b>L<sup>1</sup>–L<sup>5</sup></b> in the solid state and (b) CIE chromaticity diagram (1931 CIE standard). (c) Emission spectra of <b>L<sup>1</sup>–L<sup>5</sup></b> in acetonitrile solution and (d) CIE chromaticity diagram. | 11       |
| Figure S10 | Luminescence decay profiles of the ligands <b>L<sup>1</sup>–L<sup>5</sup></b> in (a) the solid state and (b) acetonitrile solution.                                                                                                                       | 11       |
| Figure S11 | Luminescence decay profiles of the complexes <b>Zn1–Zn5</b> in (a) the solid state and (b) acetonitrile solution.                                                                                                                                         | 12       |
| Table S1   | Selected bond distances (Å) and angles (°) for <b>Zn1</b> , <b>Zn3</b> and <b>Zn5</b> .                                                                                                                                                                   | 12       |
| Table S2   | Selected bond distances (Å) and angles (°) for <b>Zn2</b> and <b>Zn4</b> .                                                                                                                                                                                | 13       |
| Table S3   | Summary of IR and <sup>1</sup> H NMR data for complexes <b>Zn1–Zn5</b> .                                                                                                                                                                                  | 15       |
| Table S4   | The luminescence lifetimes of the ligands <b>L<sup>1</sup>–L<sup>5</sup></b> and complexes <b>Zn1–Zn5</b> in acetonitrile solution and the solid state at room temperature.                                                                               | 16       |

## Experimental Section

**Lifetime Calculations.** Lifetime studies were performed using photon-counting system with a microsecond pulse lamp as the excitation source. The emission decays were analyzed by the sum of exponential functions. The decay curve is well fitted into a double exponential function:<sup>1</sup>  $I(t) = A_1 \exp(-t/\tau_1) + A_2 \exp(-t/\tau_2)$ , where  $I$  is the luminescence intensity, and  $\tau_1$  and  $\tau_2$  are the lifetimes for the exponential components. The average lifetime was calculated according to the following equation:

$$\frac{\tau_1^2 A_1 \% + \tau_2^2 A_2 \%}{\tau_1 A_1 \% + \tau_2 A_2 \%} \quad (1).$$

**Quantum Yield Measurements.** Reference on quantum yield measurements: Lakowicz, J. R. *Principles of Fluorescence Spectroscopy*, 2<sup>nd</sup> Ed., 1999, Kluwer Academic/Plenum Publishers, New York. Quinine sulfate in 0.1 M H<sub>2</sub>SO<sub>4</sub> (quantum yield 0.546 at 350 nm) was chosen as a standard.<sup>2-4</sup> Absolute values are calculated using the standard reference sample that has a fixed and known fluorescence quantum

yield value, according to the following equation:  $Q = Q_R \frac{I}{I_R} \frac{OD_R n^2}{OD n_R^2}$  (2). In equation (2),  $Q$  is the quantum yield,  $I$  is the measured integrated emission intensity,  $n$  is the refractive index, and OD is the optical density. The subscript  $R$  refers to the reference fluorophore of known quantum yield. In order to minimize re-absorption effects absorbencies in the 10 mm fluorescence cuvette were kept under 0.05 at the excitation wavelength (350 nm).

**Synthesis of Ligand.** The Schiff base ligands **L**<sup>1</sup>–**L**<sup>5</sup> were synthesized by dissolving 2-acetylpyridine in anhydrous methanol (10 mL) and 1 molar equivalence of the respective aniline derivatives (aniline, 2-methylaniline, 2,6-dimethylaniline, 2,4,6-trimethylaniline, and 2-methoxyaniline) in anhydrous methanol (10 mL) and mixing the two. The resultant solutions were set at reflux for *ca.* 8–12 h and subsequently concentrated under reduced pressure to obtain brown oil-like crude products.

*N*-((pyridin-2-yl)ethylidene)aniline (**L**<sup>1</sup>). 2-acetylpyridine (1.58 mL, 14.13 mmol) and aniline (1.29 mL, 14.15 mmol) gave 2.53 g of product (yield: 91%). Anal. Calcd (%) for C<sub>13</sub>H<sub>12</sub>N<sub>2</sub> (M = 196.25 g mol<sup>-1</sup>): C, 79.56; H, 6.16; N, 14.27. Found: C, 79.61; H, 6.15; N, 14.23. FT-IR (KBr, cm<sup>-1</sup>): 3434(w), 3070(w), 2962(m), 2871(w), 1625(s), 1586(m), 1567(w), 1460(s), 1438(s), 1385(m), 1297(w), 1282(m), 1265(m), 1238(m), 1146(w), 1117(w), 1101(w), 1057(w), 1044(m), 995(w), 956(w), 885(w), 824(w),

780(m), 745(m), 590(w), 533(w).  $^1\text{H}$  NMR (400 MHz,  $\text{CDCl}_3$ ):  $\delta$  8.72 (d, 1H, Py- $H_6$ ), 8.09 (d, 1H, Py- $H_3$ ), 7.86 (m, 1H, Py- $H_4$ ), 7.50 (m, 1H, Py- $H_5$ ), 6.84-7.19 (m, 5H, Ph- $H_{2,3,4,5,6}$ ), 2.77 (s, 3H, - $\text{CH}_3$ ) ppm.

*(E)*-2-Methyl-*N*-((pyridin-2-yl)ethylidene)aniline ( $\mathbf{L}^2$ ). 2-acetylpyridine (1.27 mL, 11.33 mmol) and 2-methylaniline (1.21 mL, 11.31 mmol) gave 2.11 g of product (yield: 89%). Anal. Calcd (%) for  $\text{C}_{14}\text{H}_{14}\text{N}_2$  ( $M = 210.28 \text{ g mol}^{-1}$ ): C, 79.97; H, 6.71; N, 13.32. Found: C, 80.03; H, 6.74; N, 13.29. FT-IR (KBr,  $\text{cm}^{-1}$ ): 3433(w), 3056(w), 2918(w), 2860(w), 1643(s), 1584(m), 1568(w), 1499(m), 1468(m), 1437(m), 1358(s), 1299(m), 1282(s), 1239(m), 1222(w), 1190(w), 1148(w), 1102(m), 1043(m), 995(w), 955(w), 927(w), 837(w), 781(s), 743(s), 716(w), 623(w), 591(m), 537(w).  $^1\text{H}$  NMR (400 MHz,  $\text{CDCl}_3$ ):  $\delta$  8.71 (d, 1H, Py- $H_6$ ), 8.08 (d, 1H, Py- $H_3$ ), 7.84 (m, 1H, Py- $H_4$ ), 7.48 (m, 1H, Py- $H_5$ ), 6.68-7.08 (m, 4H, Ph- $H_{3,4,5,6}$ ), 2.77 (s, 3H, - $\text{CH}_3$ ), 2.19 (s, 3H, Ph- $\text{CH}_3$ ) ppm.

*(E)*-2,6-Dimethyl-*N*-((pyridin-2-yl)ethylidene)aniline ( $\mathbf{L}^3$ ). 2-acetylpyridine (1.09 mL, 9.71 mmol) and 2,6-dimethylaniline (1.20 mL, 9.73 mmol) gave 1.76 g of product (yield: 81%). Anal. Calcd (%) for  $\text{C}_{15}\text{H}_{16}\text{N}_2$  ( $M = 224.31 \text{ g mol}^{-1}$ ): C, 80.32; H, 7.19; N, 12.49. Found: C, 80.27; H, 7.18; N, 12.52. FT-IR (KBr,  $\text{cm}^{-1}$ ): 3436(w), 3053(w), 2919(w), 2855(w), 1650(s), 1584(w), 1569(w), 1478(m), 1437(m), 1357(m), 1297(w), 1282(m), 1239(m), 1148(w), 1100(m), 1044(w), 995(w), 954(w), 897(w), 780(m), 760(m), 738(w), 683(w), 623(w), 590(m), 544(w), 491(w).  $^1\text{H}$  NMR (400 MHz,  $\text{CDCl}_3$ ):  $\delta$  8.72 (d, 1H, Py- $H_6$ ), 8.06 (d, 1H, Py- $H_3$ ), 7.85 (m, 1H, Py- $H_4$ ), 7.49 (m, 1H, Py- $H_5$ ), 6.67-6.98 (m, 3H, Ph- $H_{3,4,5}$ ), 2.77 (s, 3H, - $\text{CH}_3$ ), 2.21 (s, 6H, Ph- $\text{CH}_3$ ) ppm.

*(E)*-2,4,6-Trimethyl-*N*-((pyridin-2-yl)ethylidene)aniline ( $\mathbf{L}^4$ ). 2-acetylpyridine (1.43 mL, 12.73 mmol) and 2,4,6-trimethylaniline (1.78 mL, 12.71 mmol) gave 2.80 g of product (yield: 92%). Anal. Calcd (%) for  $\text{C}_{16}\text{H}_{18}\text{N}_2$  ( $M = 238.33 \text{ g mol}^{-1}$ ): C, 80.63; H, 7.61; N, 11.75. Found: C, 80.68; H, 7.67; N, 11.70. FT-IR (KBr,  $\text{cm}^{-1}$ ): 3436(w), 3053(w), 2922(w), 2861(w), 1657(s), 1608(w), 1584(w), 1568(w), 1492(s), 1467(w), 1437(m), 1378(w), 1357(s), 1297(m), 1282(m), 1239(m), 1215(w), 1157(w), 1101(m), 1043(w), 1012(w), 995(w), 954(w), 856(m), 780(s), 742(w), 622(w), 590(m), 561(w).  $^1\text{H}$  NMR (400 MHz,  $\text{CDCl}_3$ ):  $\delta$  8.72 (d, 1H, Py- $H_6$ ), 8.08 (d, 1H, Py- $H_3$ ), 7.85 (m, 1H, Py- $H_4$ ), 7.49 (m, 1H, Py- $H_5$ ), 6.80 (s, 2H, Ph- $H_{3,5}$ ), 2.77 (s, 3H, - $\text{CH}_3$ ), 2.21 (t, 9H, Ph-

$CH_3$ ) ppm.

(*E*)-2-Methoxy-*N*-((pyridin-2-yl)ethylidene)aniline (**L**<sup>5</sup>). 2-acetylpyridine (2.0 mL, 17.83 mmol) and 2-methoxyaniline (1.85 mL, 16.49 mmol) gave 3.10 g of product (yield: 83%). Anal. Calcd (%) for C<sub>14</sub>H<sub>14</sub>N<sub>2</sub>O (M = 226.28 g mol<sup>-1</sup>): C, 74.31; H, 6.24; N, 12.38. Found: C, 74.33; H, 6.25; N, 12.35. FT-IR (KBr, cm<sup>-1</sup>): 3420(w), 3057(w), 2949(w), 2836(w), 1627(m), 1584(m), 1568(w), 1506(s), 1465(m), 1437(w), 1419(w), 1357(m), 1297(w), 1282(s), 1238(m), 1225(s), 1181(w), 1141(w), 1101(w), 1073(w), 1045(m), 1025(m), 995(w), 954(w), 910(w), 840(w), 781(m), 742(s), 622(w), 590(m), 453(w). <sup>1</sup>H NMR (400 MHz, CDCl<sub>3</sub>): δ 8.72 (d, 1H, Py-*H*<sub>6</sub>), 8.08 (d, 1H, Py-*H*<sub>3</sub>), 7.85 (t, 1H, Py-*H*<sub>4</sub>), 7.49 (t, 1H, Py-*H*<sub>5</sub>), 6.80-6.83 (m, 4H, Ph-*H*<sub>3,4,5,6</sub>), 3.87 (s, 3H, Ph-OCH<sub>3</sub>), 2.76 (s, 3H, -CH<sub>3</sub>) ppm.

## References

- (1) Y. W. Dong, R. Q. Fan, P. Wang, L. G. Wei, X. M. Wang, H. J. Zhang, S. Gao, Y. L. Yang and Y. L. Wang, *Dalton Trans.*, 2015, **44**, 5306–5322.
- (2) R. Z. Lakowicz, *Principles of fluorescence spectroscopy* (2<sup>nd</sup> Ed); Klumer Academic/Plenum Publisher: New York, 1999.
- (3) H. Liu, T. Ye and C. Mao, *Angew. Chem., Int. Ed.*, 2007, **46**, 6473–6475.
- (4) S. Chen, Y. K. Wu, Y. Zhao and D. N. Fang, *RSC Adv.*, 2015, **5**, 72009–72018.

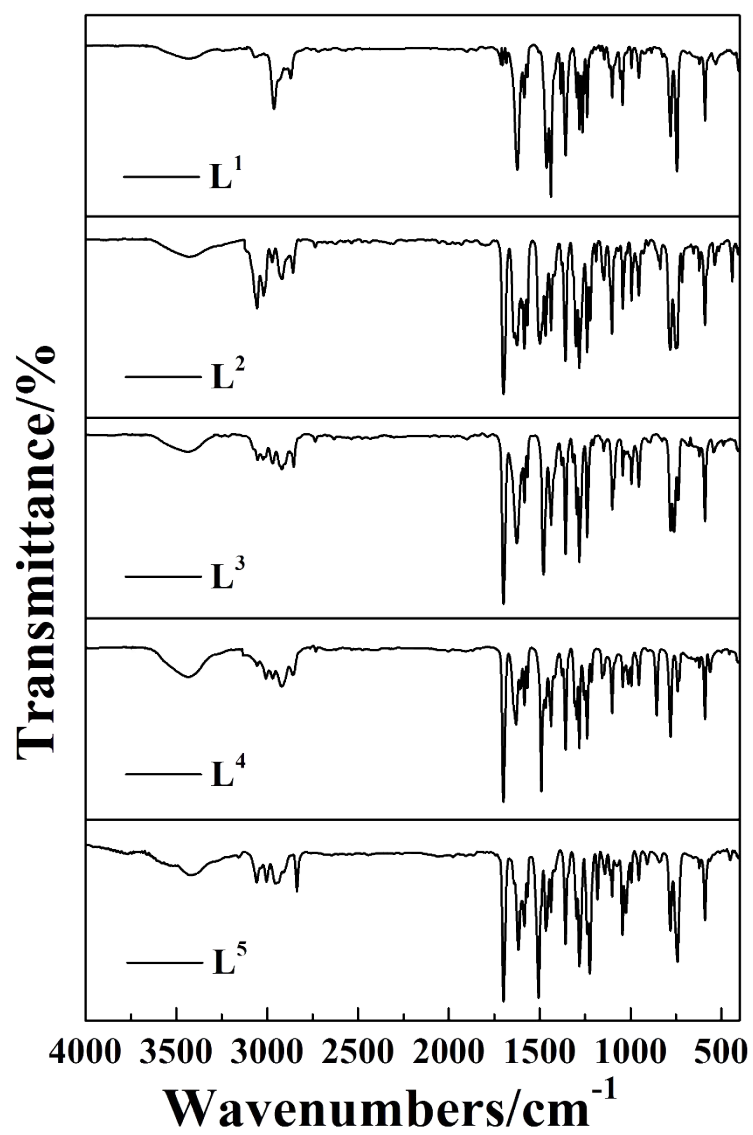

Figure S1. IR spectra of ligands L<sup>1</sup>–L<sup>5</sup> in KBr disks.

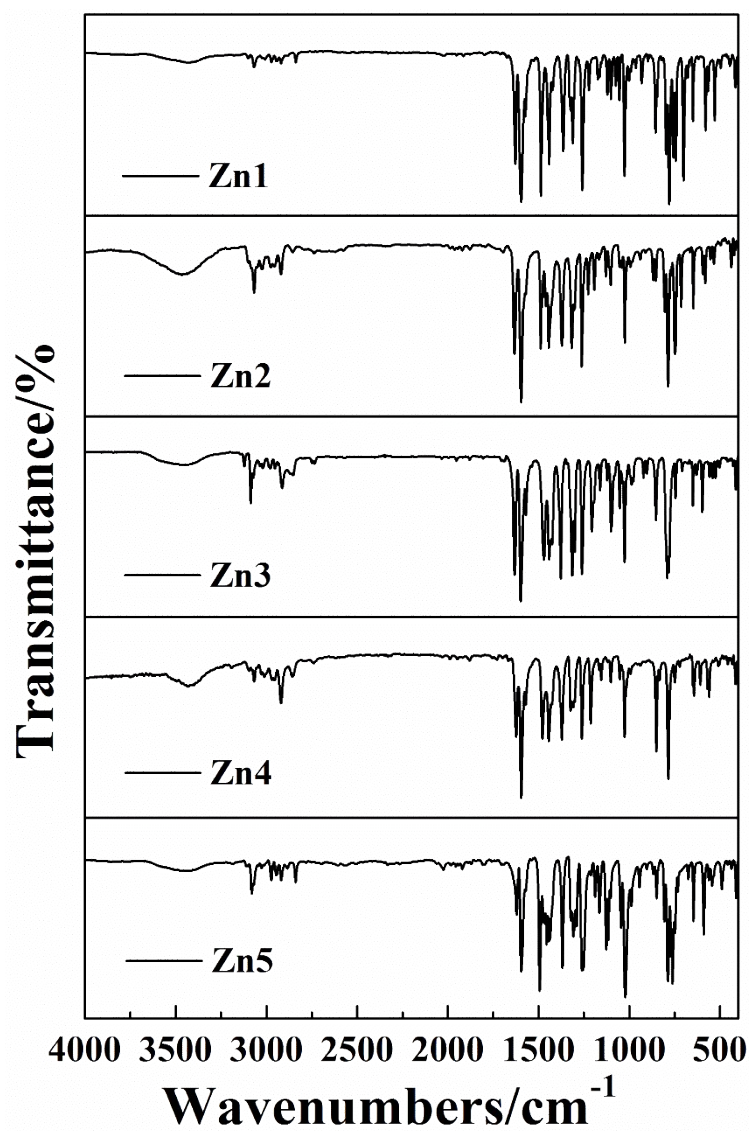

Figure S2. IR spectra of complexes **Zn1–Zn5** in KBr disks.

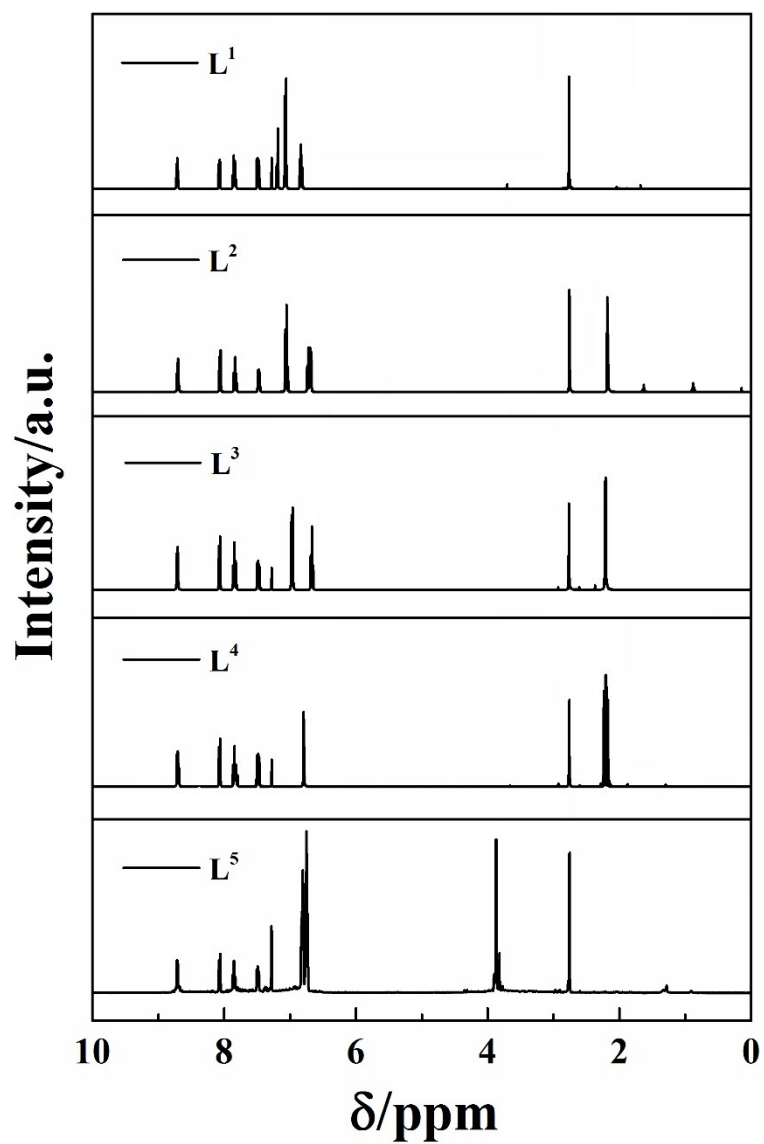

Figure S3.  $^1\text{H}$  NMR spectra of ligands  $\text{L}^1$ – $\text{L}^5$  in  $\text{CDCl}_3$ .

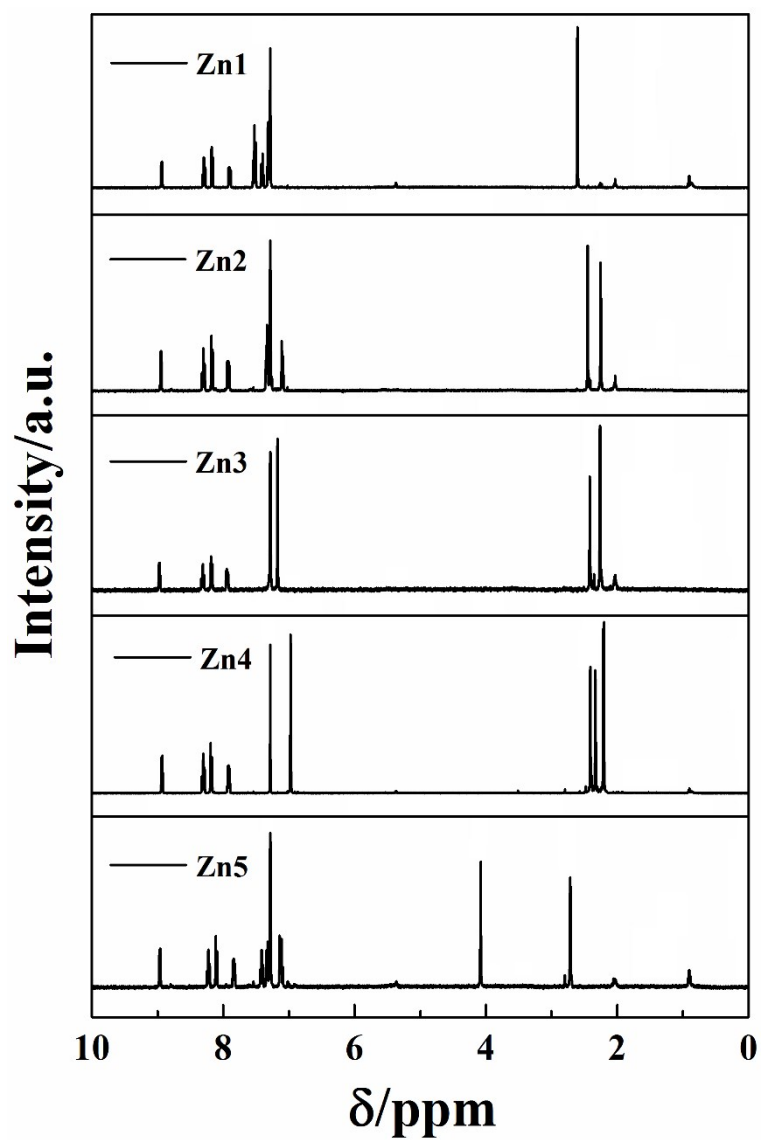

**Figure S4.**  $^1\text{H}$  NMR spectra of complexes **Zn1–Zn5** in  $\text{CDCl}_3$ .



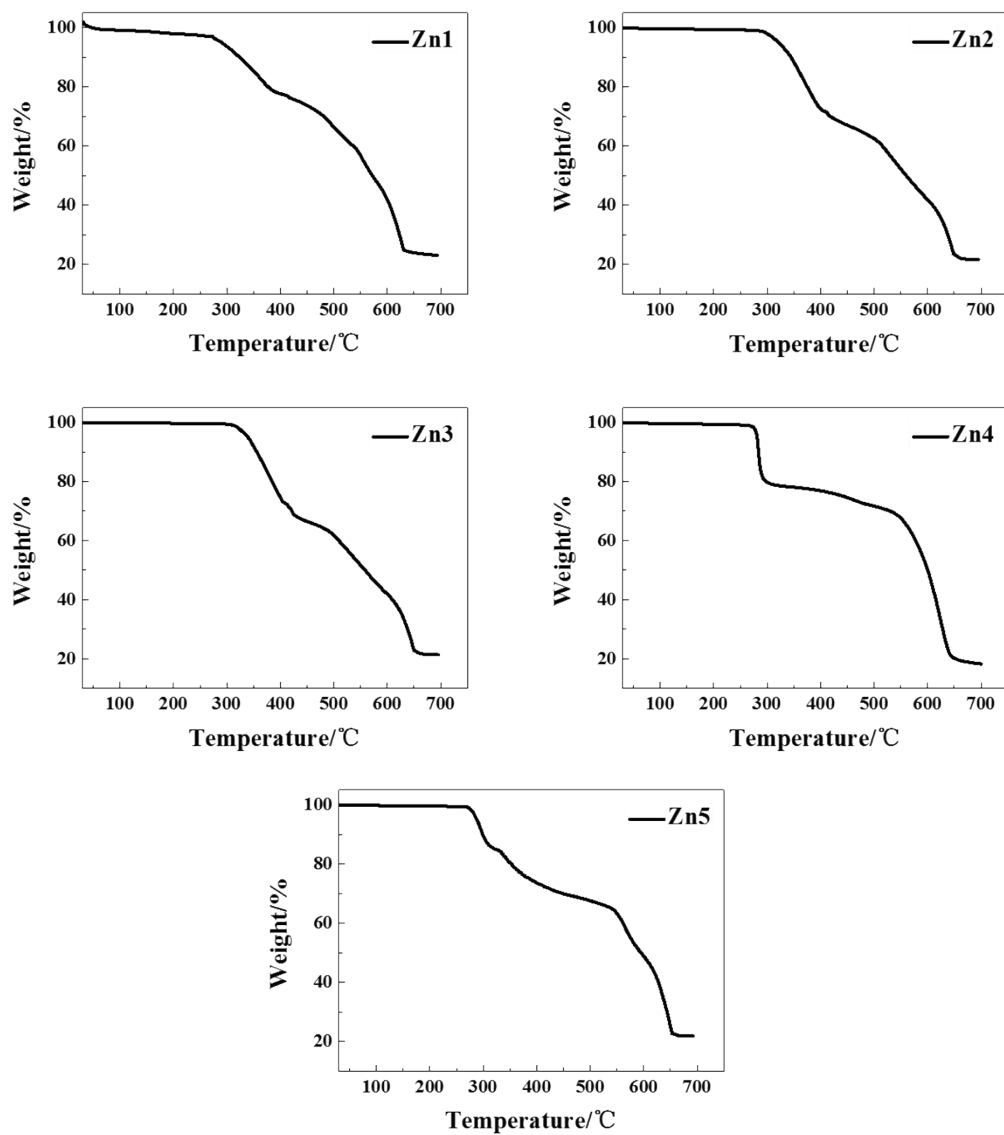

**Figure S5.** Thermal gravimetric curves of complexes Zn1–Zn5.

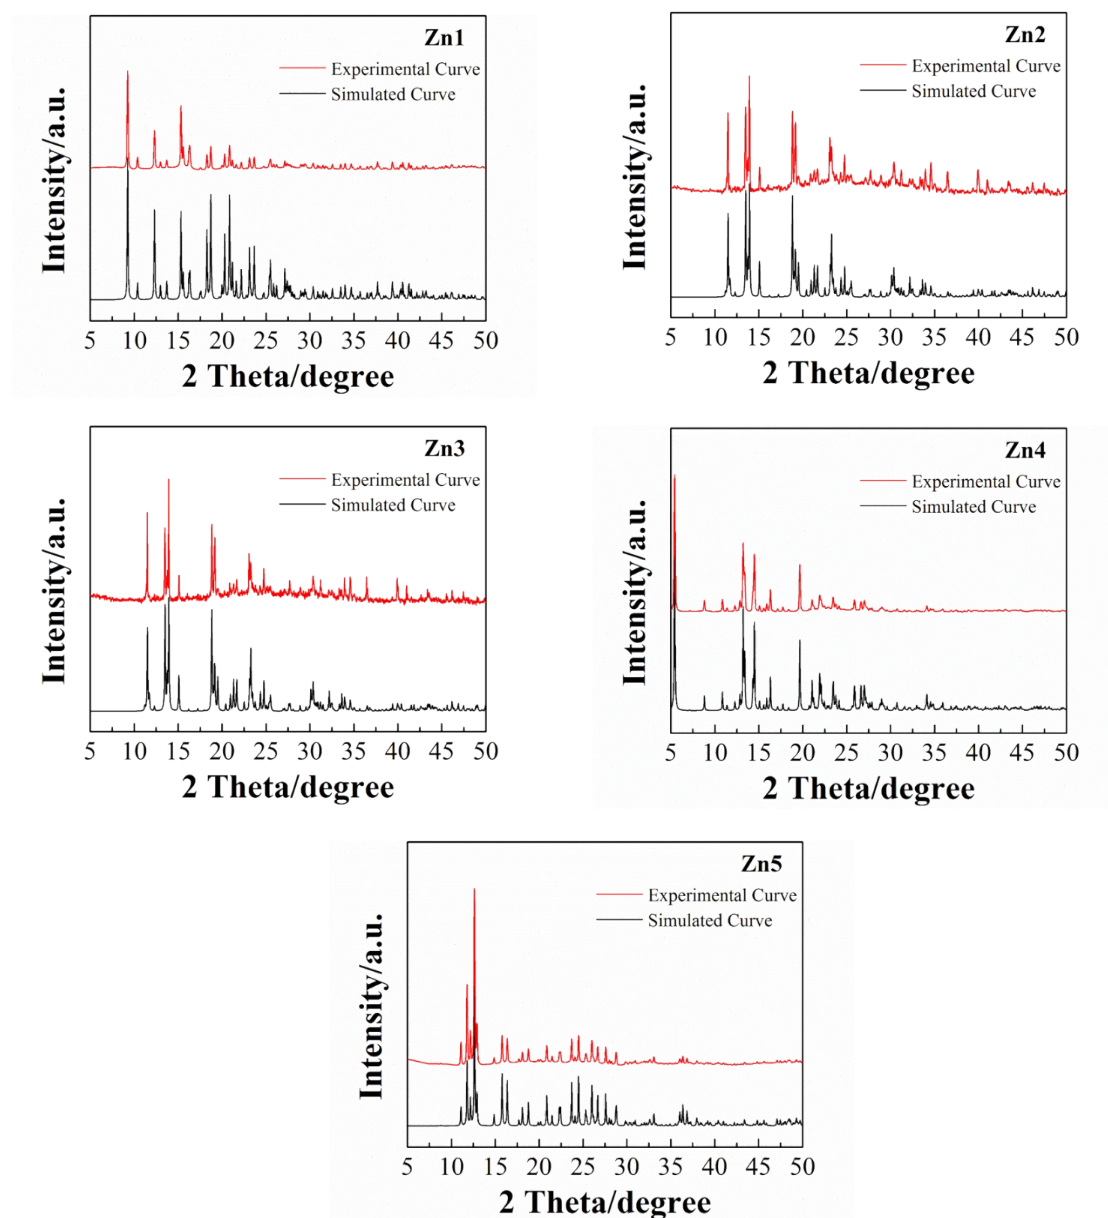

**Figure S6.** Experimental (top) and simulated (bottom) PXR D patterns of complexes **Zn1–Zn5**.

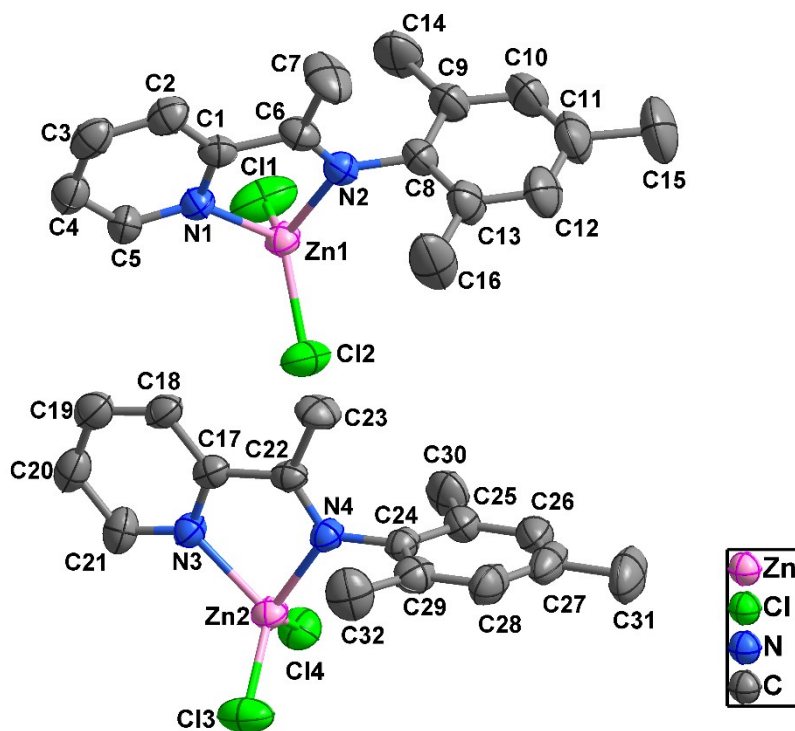

**Figure S7.** Crystal structure of **Zn4**. Thermal ellipsoid is drawn at 50% probability. H atoms have been omitted for clarity.

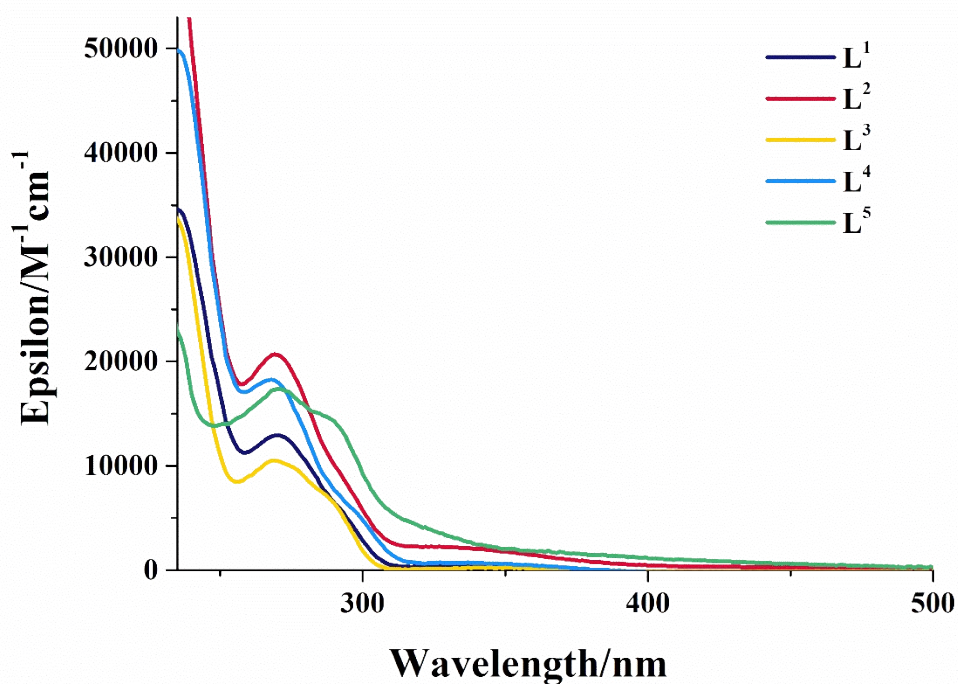

**Figure S8.** UV-vis absorption spectra of **L<sup>1</sup>–L<sup>5</sup>** in **CH<sub>3</sub>CN** at room temperature.

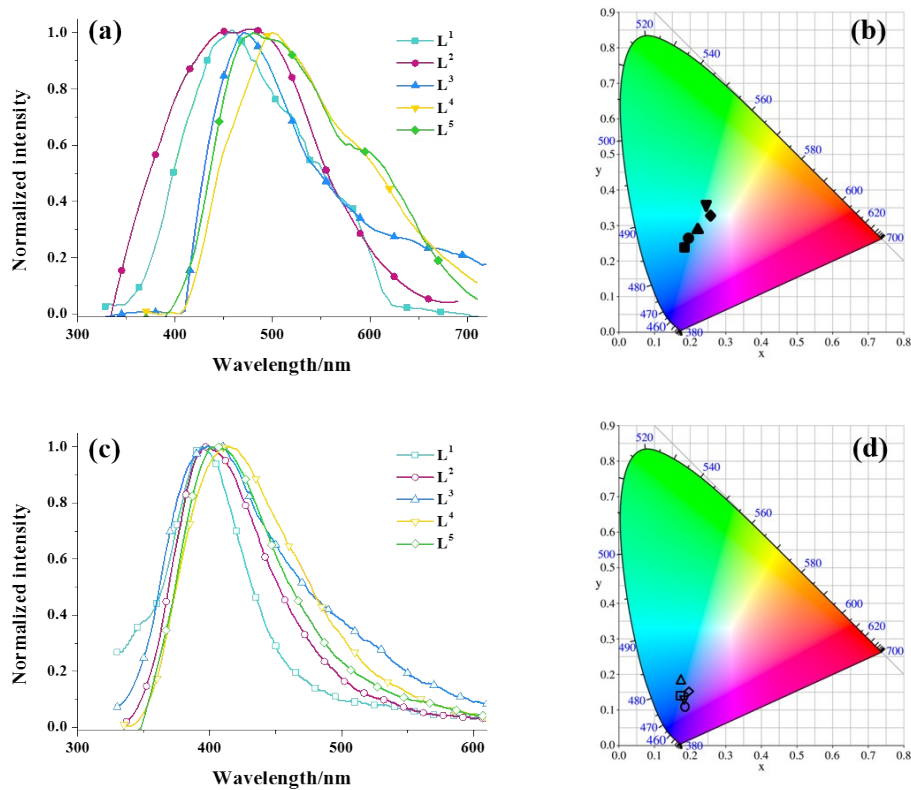

**Figure S9.** (a) Emission spectra of L<sup>1</sup>–L<sup>5</sup> in the solid state and (b) CIE chromaticity diagram (1931 CIE standard). (c) Emission spectra of L<sup>1</sup>–L<sup>5</sup> in acetonitrile solution and (d) CIE chromaticity diagram.

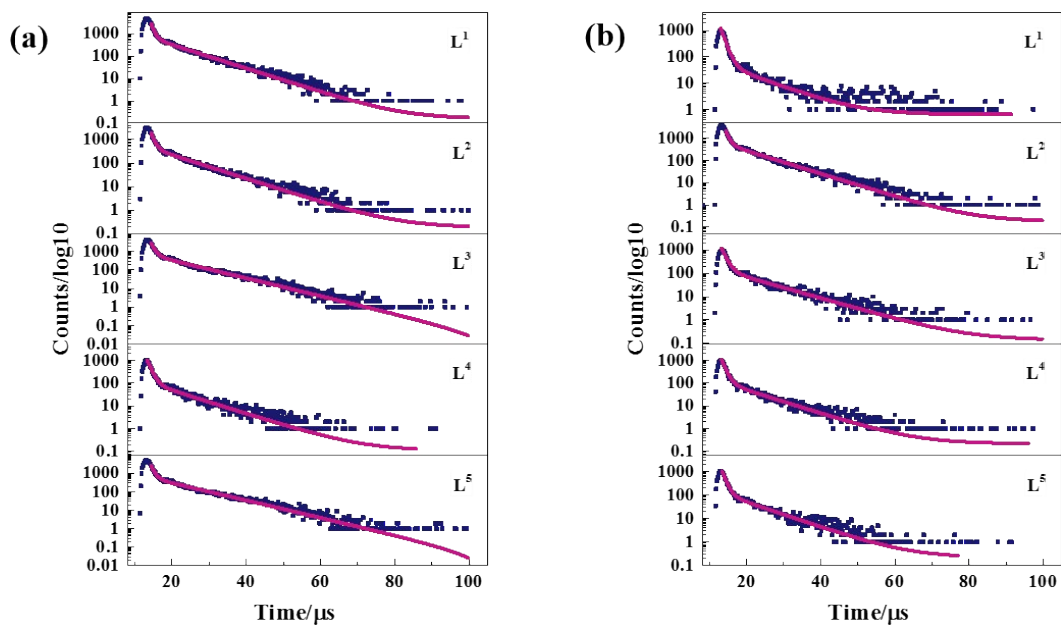

**Figure S10.** Luminescence decay profiles of the ligands L<sup>1</sup>–L<sup>5</sup> in (a) the solid state and (b) acetonitrile solution.

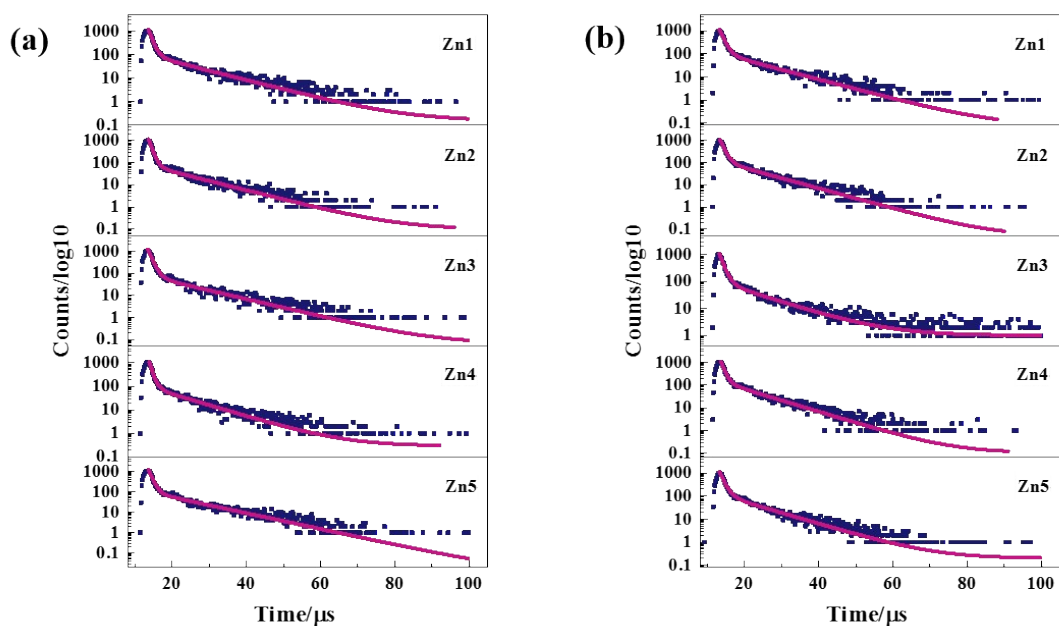

**Figure S11.** Luminescence decay profiles of the complexes **Zn1–Zn5** in (a) the solid state and (b) acetonitrile solution.

**Table S1.** Selected bond distances (Å) and angles (°) for **Zn1**, **Zn3** and **Zn5**.

| Parameter         | <b>Zn1</b> | <b>Zn3</b> | <b>Zn5</b> |
|-------------------|------------|------------|------------|
| Zn(1)-N(1)        | 2.051(3)   | 2.066(2)   | 2.087(2)   |
| Zn(1)-N(2)        | 2.049(2)   | 2.0691(18) | 2.083(2)   |
| Zn(1)-Cl(1)       | 2.1955(10) | 2.1979(8)  | 2.2233(8)  |
| Zn(1)-Cl(2)       | 2.1915(9)  | 2.1969(9)  | 2.2233(10) |
| N(2)-C(6)         | 1.275(4)   | 1.278(3)   | 1.287(3)   |
| N(1)-Zn(1)-N(2)   | 79.78(11)  | 79.73(8)   | 78.08(8)   |
| N(1)-Zn(1)-Cl(1)  | 116.19(8)  | 114.58(6)  | 104.50(7)  |
| N(2)-Zn(1)-Cl(1)  | 112.19(8)  | 111.04(6)  | 133.23(6)  |
| N(1)-Zn(1)-Cl(2)  | 110.02(9)  | 109.19(7)  | 112.97(6)  |
| N(2)-Zn(1)-Cl(2)  | 118.26(8)  | 118.90(6)  | 105.61(6)  |
| Cl(1)-Zn(1)-Cl(2) | 115.53(4)  | 117.55(4)  | 115.21(3)  |
| C(5)-N(1)-Zn(1)   | 127.9(3)   | 127.87(17) | 127.0(2)   |
| C(1)-N(1)-Zn(1)   | 113.1(2)   | 112.92(15) | 114.06(16) |
| C(6)-N(2)-Zn(1)   | 116.2(2)   | 114.86(16) | 116.14(16) |
| C(8)-N(2)-Zn(1)   | 121.2(2)   | 123.22(14) | 120.40(15) |

**Table S2.** Selected bond distances (Å) and angles (°) for **Zn2** and **Zn4**.

| Parameter         | <b>Zn2</b> | Parameter         | <b>Zn4</b> |
|-------------------|------------|-------------------|------------|
| Zn(1)-N(1)        | 2.073(3)   | Zn(1)-N(1)        | 2.061(3)   |
| Zn(1)-N(2)        | 2.055(3)   | Zn(1)-N(2)        | 2.071(3)   |
| Zn(1)-Cl(1)       | 2.2105(16) | Zn(1)-Cl(1)       | 2.2020(14) |
| Zn(1)-Cl(2)       | 2.1949(15) | Zn(1)-Cl(2)       | 2.1915(12) |
| N(2)-C(6)         | 1.277(4)   | N(2)-C(6)         | 1.285(5)   |
| Zn(2)-N(3)        | 2.068(3)   | Zn(2)-N(3)        | 2.063(3)   |
| Zn(2)-N(4)        | 2.055(3)   | Zn(2)-N(4)        | 2.067(3)   |
| Zn(2)-Cl(3)       | 2.1971(17) | Zn(2)-Cl(3)       | 2.2110(13) |
| Zn(2)-Cl(4)       | 2.1996(16) | Zn(2)-Cl(4)       | 2.1994(11) |
| N(4)-C(20)        | 1.284(4)   | N(4)-C(22)        | 1.286(4)   |
| N(1)-Zn(1)-N(2)   | 79.32(12)  | N(1)-Zn(1)-N(2)   | 79.69(11)  |
| N(1)-Zn(1)-Cl(1)  | 112.45(9)  | N(1)-Zn(1)-Cl(1)  | 110.07(9)  |
| N(2)-Zn(1)-Cl(1)  | 112.65(10) | N(2)-Zn(1)-Cl(1)  | 116.68(9)  |
| N(1)-Zn(1)-Cl(2)  | 114.33(9)  | N(1)-Zn(1)-Cl(2)  | 112.50(9)  |
| N(2)-Zn(1)-Cl(2)  | 118.15(9)  | N(2)-Zn(1)-Cl(2)  | 116.25(9)  |
| Cl(1)-Zn(1)-Cl(2) | 115.01(6)  | Cl(1)-Zn(1)-Cl(2) | 115.92(5)  |
| C(5)-N(1)-Zn(1)   | 113.4(2)   | C(5)-N(1)-Zn(1)   | 127.1(2)   |
| C(1)-N(1)-Zn(1)   | 127.7(3)   | C(1)-N(1)-Zn(1)   | 113.9(2)   |
| C(6)-N(2)-Zn(1)   | 115.6(2)   | C(6)-N(2)-Zn(1)   | 114.1(2)   |
| C(8A)-N(2)-Zn(1)  | 124.2(3)   | C(8)-N(2)-Zn(1)   | 124.9(2)   |
| C(8B)-N(2)-Zn(1)  | 121.2(7)   |                   |            |
| N(3)-Zn(2)-N(4)   | 79.61(12)  | N(3)-Zn(2)-N(4)   | 79.77(10)  |
| N(3)-Zn(2)-Cl(3)  | 113.08(9)  | N(3)-Zn(2)-Cl(3)  | 115.39(9)  |
| N(4)-Zn(2)-Cl(3)  | 117.95(10) | N(4)-Zn(2)-Cl(3)  | 111.57(8)  |
| N(3)-Zn(2)-Cl(4)  | 112.85(9)  | N(3)-Zn(2)-Cl(4)  | 108.61(8)  |
| N(4)-Zn(2)-Cl(4)  | 111.57(9)  | N(4)-Zn(2)-Cl(4)  | 119.01(8)  |
| Cl(3)-Zn(2)-Cl(4) | 116.39(5)  | Cl(3)-Zn(2)-Cl(4) | 116.92(5)  |

---

|                   |           |                  |            |
|-------------------|-----------|------------------|------------|
| C(19)-N(3)-Zn(2)  | 113.1(2)  | C(21)-N(3)-Zn(2) | 127.0(2)   |
| C(15)-N(3)-Zn(2)  | 128.1(2)  | C(17)-N(3)-Zn(2) | 113.7(2)   |
| C(20)-N(4)-Zn(2)  | 115.7(2)  | C(22)-N(4)-Zn(2) | 114.5(2)   |
| C(22A)-N(4)-Zn(2) | 123.0(4)  | C(24)-N(4)-Zn(2) | 124.85(19) |
| C(22B)-N(4)-Zn(2) | 122.8(11) |                  |            |

---

**Table S3.** Summary of IR and <sup>1</sup>H NMR data for complexes **Zn1–Zn5**.

| Complex    | IR data ( $\nu/\text{cm}^{-1}$ )                                                                                                                                                                                                                                                                                                      | <sup>1</sup> H NMR data ( $\delta/\text{ppm}$ )                                                                                                                                                                                                                                                                           |
|------------|---------------------------------------------------------------------------------------------------------------------------------------------------------------------------------------------------------------------------------------------------------------------------------------------------------------------------------------|---------------------------------------------------------------------------------------------------------------------------------------------------------------------------------------------------------------------------------------------------------------------------------------------------------------------------|
| <b>Zn1</b> | 3429(w), 3069(w), 2943(w), 2838(w), 1623(m), 1596(s), 1573(s), 1486(s), 1442(m), 1423(w), 1364(m), 1322(w), 1312(m), 1258(s), 1222(w), 1173(w), 1164(w), 1121(w), 1100(w), 1076(w), 1055(w), 1026(s), 1001(w), 964(w), 932(w), 856(m), 797(m), 780(s), 757(s), 744(s), 702(s), 678(w), 649(m), 580(m), 565(w), 530(m), 496(w), 446(w) | 8.94 (d, 1H, Py- <i>H</i> <sub>6</sub> ), 8.30 (d, 1H, Py- <i>H</i> <sub>3</sub> ), 8.18 (m, 1H, Py- <i>H</i> <sub>4</sub> ), 7.91 (m, 1H, Py- <i>H</i> <sub>5</sub> ), 7.30-7.53 (m, 5H, Ph- <i>H</i> <sub>2,3,4,5,6</sub> ), 2.60 (s, 3H, -CH <sub>3</sub> )                                                            |
| <b>Zn2</b> | 3449(w), 3067(w), 2955(w), 2854(w), 1632(m), 1596(s), 1570(m), 1488(m), 1459(w), 1443(m), 1370(m), 1317(m), 1304(w), 1262(m), 1226(w), 1193(w), 1167(w), 1129(w), 1101(w), 1053(w), 1024(m), 994(w), 939(w), 910(w), 868(w), 854(w), 804(m), 786(s), 749(s), 714(m), 647(m), 595(w), 581(w), 552(w), 533(w), 496(w), 438(w)           | 8.95 (d, 1H, Py- <i>H</i> <sub>6</sub> ), 8.30 (d, 1H, Py- <i>H</i> <sub>3</sub> ), 8.18 (m, 1H, Py- <i>H</i> <sub>4</sub> ), 7.92 (m, 1H, Py- <i>H</i> <sub>5</sub> ), 7.09-7.33 (m, 4H, Ph- <i>H</i> <sub>3,4,5,6</sub> ), 2.45 (s, 3H, -CH <sub>3</sub> ), 2.25 (s, 3H, Ph-CH <sub>3</sub> )                           |
| <b>Zn3</b> | 3442(w), 3073(w), 2912(w), 2852(w), 1631(m), 1598(s), 1569(w), 1470(m), 1441(m), 1425(w), 1425(w), 1377(s), 1314(s), 1300(m), 1260(s), 1207(m), 1162(w), 1123(w), 1100(m), 1053(w), 1025(m), 987(w), 922(w), 903(w), 854(m), 791(s), 782(s), 746(s), 708(w), 649(w), 628(w), 598(w), 558(w), 541(w), 525(w), 503(w), 439(w)           | 8.98 (d, 1H, Py- <i>H</i> <sub>6</sub> ), 8.31 (d, 1H, Py- <i>H</i> <sub>3</sub> ), 8.19 (m, 1H, Py- <i>H</i> <sub>4</sub> ), 7.94 (t, 1H, Py- <i>H</i> <sub>5</sub> ), 7.17 (s, 3H, Ph- <i>H</i> <sub>3,4,5</sub> ), 2.42 (s, 3H, -CH <sub>3</sub> ), 2.26 (s, 6H, Ph-CH <sub>3</sub> )                                  |
| <b>Zn4</b> | 3428(w), 3067(w), 2920(w), 2857(w), 1623(m), 1595(s), 1570(w), 1478(m), 1443(m), 1371(m), 1323(w), 1308(w), 1260(m), 1213(m), 1166(w), 1155(w), 1119(w), 1101(w), 1053(w), 1025(s), 994(w), 939(w), 851(s), 833(w), 785(s), 749(w), 722(w), 642(w), 609(w), 569(w), 560(w), 510(w), 457(w), 433(w)                                    | 8.94 (d, 1H, Py- <i>H</i> <sub>6</sub> ), 8.31 (d, 1H, Py- <i>H</i> <sub>3</sub> ), 8.19 (m, 1H, Py- <i>H</i> <sub>4</sub> ), 7.92 (m, 1H, Py- <i>H</i> <sub>5</sub> ), 6.97 (s, 2H, Ph- <i>H</i> <sub>3,5</sub> ), 2.41 (s, 3H, -CH <sub>3</sub> ), 2.33 (s, 3H, Ph-CH <sub>3</sub> ), 2.21 (s, 3H, Ph-CH <sub>3</sub> ) |
| <b>Zn5</b> | 3431(w), 3069(w), 2946(w), 2839(w), 1620(w), 1595(s), 1494(s), 1455(w), 1443(m), 1368(s), 1321(w), 1308(m), 1291(m), 1259(s), 1189(w), 1165(w), 1128(m), 1115(m), 1103(w), 1046(m), 1022(s), 988(w), 943(w), 904(w), 867(w), 850(w), 807(w), 787(s), 762(s), 733(w), 676(w), 646(m), 590(m), 561(w), 545(w), 488(w), 437(w)           | 8.97 (d, 1H, Py- <i>H</i> <sub>6</sub> ), 8.23 (d, 1H, Py- <i>H</i> <sub>3</sub> ), 8.11 (t, 1H, Py- <i>H</i> <sub>4</sub> ), 7.84 (t, 1H, Py- <i>H</i> <sub>5</sub> ), 7.09-7.42 (m, 4H, Ph- <i>H</i> <sub>3,4,5,6</sub> ), 4.08 (s, 3H, Ph-OCH <sub>3</sub> ), 2.72 (s, 3H, -CH <sub>3</sub> )                          |



**Table S4.** The luminescence lifetimes of the ligands **L<sup>1</sup>–L<sup>5</sup>** and complexes **Zn1–Zn5** in acetonitrile solution and the solid state at room temperature.

| Complex              | $\tau_1$ ( $\mu\text{s}$ ) | $A_1$ (%) | $\tau_2$ ( $\mu\text{s}$ ) | $A_2$ (%) | $\tau^a$ ( $\mu\text{s}$ ) | Conditions         |
|----------------------|----------------------------|-----------|----------------------------|-----------|----------------------------|--------------------|
| <b>L<sup>1</sup></b> | 1.07                       | 76.88     | 8.27                       | 23.12     | 6.10                       | CH <sub>3</sub> CN |
|                      | 0.78                       | 27.74     | 8.19                       | 72.26     | 7.93                       | solid              |
| <b>Zn1</b>           | 1.10                       | 55.84     | 10.27                      | 44.16     | 9.15                       | CH <sub>3</sub> CN |
|                      | 0.94                       | 54.70     | 10.84                      | 45.30     | 9.90                       | solid              |
| <b>L<sup>2</sup></b> | 0.86                       | 27.36     | 8.38                       | 72.64     | 8.10                       | CH <sub>3</sub> CN |
|                      | 0.87                       | 28.97     | 8.64                       | 71.03     | 8.33                       | solid              |
| <b>Zn2</b>           | 1.05                       | 52.59     | 9.46                       | 47.41     | 8.54                       | CH <sub>3</sub> CN |
|                      | 0.87                       | 60.79     | 10.22                      | 39.21     | 9.13                       | solid              |
| <b>L<sup>3</sup></b> | 1.15                       | 51.34     | 9.57                       | 48.66     | 8.62                       | CH <sub>3</sub> CN |
|                      | 0.90                       | 28.38     | 9.04                       | 71.62     | 8.73                       | solid              |
| <b>Zn3</b>           | 1.07                       | 57.71     | 9.79                       | 42.29     | 8.66                       | CH <sub>3</sub> CN |
|                      | 1.04                       | 63.25     | 11.03                      | 36.75     | 9.64                       | solid              |
| <b>L<sup>4</sup></b> | 1.03                       | 56.04     | 8.43                       | 43.96     | 7.43                       | CH <sub>3</sub> CN |
|                      | 1.02                       | 53.90     | 8.47                       | 46.10     | 7.55                       | solid              |
| <b>Zn4</b>           | 0.94                       | 47.40     | 8.77                       | 52.60     | 8.08                       | CH <sub>3</sub> CN |
|                      | 0.79                       | 54.02     | 9.14                       | 45.98     | 8.37                       | solid              |
| <b>L<sup>5</sup></b> | 0.98                       | 53.16     | 8.13                       | 46.84     | 7.27                       | CH <sub>3</sub> CN |
|                      | 0.84                       | 28.83     | 9.21                       | 71.17     | 8.91                       | solid              |
| <b>Zn5</b>           | 1.13                       | 56.37     | 9.14                       | 43.63     | 8.04                       | CH <sub>3</sub> CN |
|                      | 0.96                       | 54.24     | 11.19                      | 45.76     | 10.25                      | solid              |

$$^a \tau = \frac{\tau_1^2 A_1 \% + \tau_2^2 A_2 \%}{\tau_1 A_1 \% + \tau_2 A_2 \%}$$
